# Supplementary material for: Comparing Survival Outcomes for Advanced Cancer Patients Who Received Complex Genomic Profiling Using a Synthetic Control Arm
Source: PubMed Central journal article supplement — Target Oncol. 2022 Sep 5;17(5):539–48. doi: 10.1007/s11523-022-00910-0 (PMC9512745; doi:10.1007/s11523-022-00910-0), 2022-09-05
Supplement: 11523_2022_910_MOESM1_ESM.pdf [file 11523_2022_910_MOESM1_ESM.pdf]

## Supplementary Information File

**Article: Comparing survival outcomes for advanced cancer patients who received complex genomic profiling using a synthetic control arm**

**Authors:** Sophie O’Haire<sup>1,2</sup>, Koen Degeling<sup>1,3</sup>, Fanny Franchini<sup>1,2,4</sup>, Ben Tran<sup>2,5</sup>, Stephen J Luen<sup>2,5</sup>, Clara Gaff<sup>6,7,8</sup>, Kortnye Smith<sup>2,5</sup>, Stephen Fox<sup>2,4</sup>, Jayesh Desai<sup>2,5</sup>, Maarten IJzerman<sup>1,2,4</sup>

### Author affiliations:

<sup>1</sup> Cancer Health Services Research, Centre for Cancer Research, Faculty of Medicine, Dentistry and Health Sciences, The University of Melbourne, Melbourne, Australia

<sup>2</sup> Sir Peter MacCallum Department of Oncology, Faculty of Medicine, Dentistry and Health Sciences, The University of Melbourne, Melbourne, Australia

<sup>3</sup> Cancer Health Services Research, Centre for Health Policy, Melbourne School of Population and Global Health, Faculty of Medicine, Dentistry and Health Sciences, The University of Melbourne, Melbourne, Australia

<sup>4</sup> Department of Cancer Research and Pathology, Peter MacCallum Cancer Centre, Melbourne, Australia

<sup>5</sup> Department of Medical Oncology, Peter MacCallum Cancer Centre, Melbourne, Australia

<sup>6</sup> Melbourne Genomics Health Alliance, Walter and Eliza Hall Institute, Melbourne, Australia

<sup>7</sup> Department of Paediatrics, Faculty of Medicine, Dentistry and Health Sciences, University of Melbourne, Melbourne, Australia

<sup>8</sup> Murdoch Children’s Research Institute, Melbourne Australia

**Corresponding author:** Sophie O’Haire, Peter MacCallum Cancer Centre.

[Sophie.ohaire@petermac.org](mailto:Sophie.ohaire@petermac.org), ORCID ID: 0000-0003-1283-8831

## Supplementary Information

| <b>Supplementary Table S1. CGP Informed Treatment Detail (N=25)</b> |                    |                       |                  |
|---------------------------------------------------------------------|--------------------|-----------------------|------------------|
| <b>Therapeutic</b>                                                  | <b>Access</b>      | <b>Variant</b>        | <b>Frequency</b> |
| MEK & CDK4/6 inhibitor                                              | Trial              | SDHB m (g)            | 1                |
| MEK & CDK4/6 inhibitor                                              | Trial              | KRASm                 | 1                |
| MEK & CDK4/6 inhibitor                                              | Trial              | CDKN2A focal deletion | 1                |
| PARP Inhibitor                                                      | Trial              | BRCA1 m (1s, 1g)      | 2                |
| RET inhibitor                                                       | Trial              | RET m                 | 4                |
| TRK inhibitor                                                       | Trial              | ETV6-NTRK3 fusion     | 1                |
| KIT Tyrosine Kinase Inhibitor                                       | Off Label          | KIT m                 | 2                |
| Anti PD1 & MEK Inhibitor                                            | Off Label          | NRAS m                | 1                |
| BRAF & MEK inhibitor                                                | Off Label          | BRAFm                 | 1                |
| Parp Inhibitor                                                      | Off Label          | BRCA2 m (g)           | 1                |
| SMO Inhibitor                                                       | 1 SOC, 1 Off Label | PTCH1 m               | 2                |
| Anti HER2                                                           | Trial              | ERBB2 m               | 1                |
| Anti HER2                                                           | Trial              | ERBB2 m               | 1                |
| Cisplatin as opposed to BSC                                         | SOC                | BRCA2 m               | 1                |
| Anti PD-L1                                                          | Trial              | Focal CD274 amp       | 1                |
| Addition of anti CTLA-4 to anti PD1                                 | Off Label          | JAK1m                 | 1                |
| MEK & RAF Dimer inhibitor                                           | Trial              | NF1 m                 | 1                |
| FGFR inhibitor                                                      | Trial              | FGFR2-BICC1 fusion    | 1                |
| FGFR inhibitor                                                      | Trial              | FGFR2 m               | 1                |

m; mutation (SNV), s; somatic, g; germline, amp; amplification, SOC; standard of care

| <b>Supplementary Table S2. Propensity Score Model (<math>\pi</math>=probability of receiving CGP)</b> |                 |                |                    |
|-------------------------------------------------------------------------------------------------------|-----------------|----------------|--------------------|
|                                                                                                       | Coefficient     | Standard Error | <i>p</i> value     |
| <b>Age</b>                                                                                            | -0.018          | 0.011          | <i>0.106</i>       |
| <b>Sex</b>                                                                                            |                 |                |                    |
| M                                                                                                     | -0.252          | 0.293          | <i>0.389</i>       |
| <b>ECOG</b>                                                                                           |                 |                |                    |
| 0                                                                                                     | Ref             |                |                    |
| 1                                                                                                     | -0.322          | 0.301          | <i>0.284</i>       |
| 2                                                                                                     | -0.243          | 0.574          | <i>0.672</i>       |
| <b>Failed Lines of Systemic Treatment</b>                                                             | -0.524          | 0.147          | <i>&lt;0.000**</i> |
| <b>Therapeutic Options Remaining*</b>                                                                 |                 |                |                    |
| 0                                                                                                     | Ref             |                |                    |
| 1                                                                                                     | -0.026          | 0.331          | <i>0.938</i>       |
| 2 or more                                                                                             | 0.583           | 0.646          | <i>0.367</i>       |
| <b>Primary</b>                                                                                        |                 |                |                    |
| CUP                                                                                                   | -1.600          | 0.754          | <i>0.034*</i>      |
| GU                                                                                                    | -1.255          | 0.774          | <i>0.105</i>       |
| Gynae                                                                                                 | 0.433           | 0.635          | <i>0.495</i>       |
| H&N/NM Skin                                                                                           | -1.329          | 0.642          | <i>0.038*</i>      |
| Lung                                                                                                  | Ref             |                |                    |
| Melanoma                                                                                              | 0.814           | 0.837          | <i>0.331</i>       |
| Other Rare                                                                                            | -0.459          | 0.703          | <i>0.514</i>       |
| Sarcoma                                                                                               | -0.691          | 0.688          | <i>0.316</i>       |
| UGI                                                                                                   | -1.112          | 0.561          | <i>0.047*</i>      |
| <b>Rare Cancer</b>                                                                                    |                 |                |                    |
| Yes                                                                                                   | 0.761           |                | <i>0.086</i>       |
| <b>AIC</b>                                                                                            | 358.28          |                |                    |
| <b>Hosmer-Lemeshow Goodness of Fit (g=10)</b>                                                         | <i>p=0.1772</i> |                |                    |

AIC, Akaike Information Criterion. \* $p < 0.05$ , \*\* $p < 0.01$

## Supplementary Figure S1

Kernel density plot of inverse probability of treatment weights by CGP group

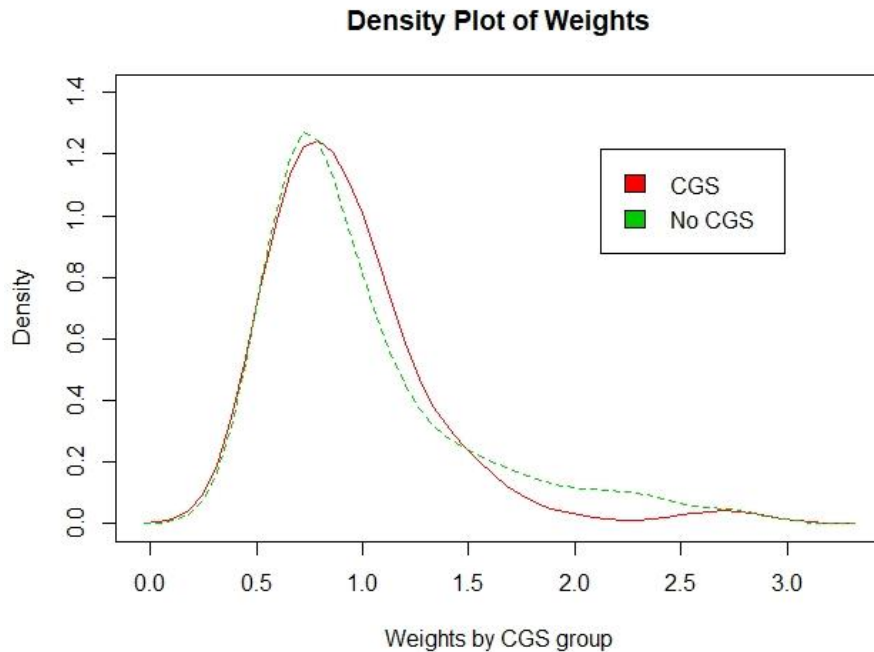

## Supplementary Notes

NGS Assay Description - Targeted gene sequencing of coding regions and splice sites was performed on DNA extracted from tissue and matched blood. Libraries were prepared and enriched using SureSelect XT target enrichment (Agilent Design ID 3016871). Indexed libraries were pooled and sequenced to a targeted coverage of 500/100 reads/base (tumour/blood) on Illumina NextSeq500 using 2x75bp reads. Seqliner v0.7 was used to generate aligned reads and call variants against the hg19 human reference genome. PathOS v1.3 was used to annotate and transform variants to standard nomenclature and filter for rare, non-synonymous variants within 20bp of coding exons. Germline (blood) analysis was limited to 76 genes with evidence for cancer predisposition (modified from Rahman, Nature 2014;16;505(7483):302-328). Copy number loss was detected using GAFFA2. Structural variants were detected using GRIDSS (<https://github.com/PapenfussLab/gridss>). Variants are described according to HGVS nomenclature version 15.11 (<http://varnomen.hgvs.org/>) with minor differences in accordance with Molecular Pathology policy. The policy as it pertains to this report is available by contacting the laboratory on the number below. Therapeutic implications are adapted from AMP/ASCO/CAP guidelines for the interpretation of somatic variants.
